# Supplementary material
Source: PubMed Central journal article supplement (PMC2048697)
Supplement: plntcell_tpc.106.045682_1.pdf [file plntcell_tpc.106.045682_1.pdf]

Barleben et al. Supplemental Data

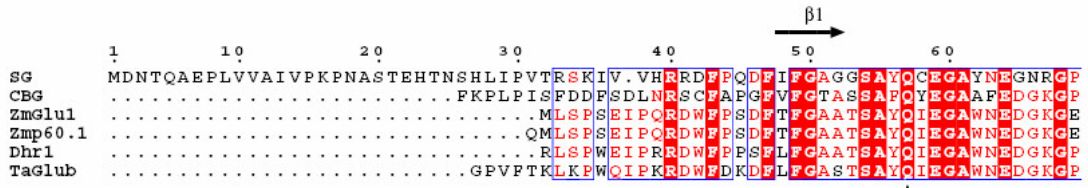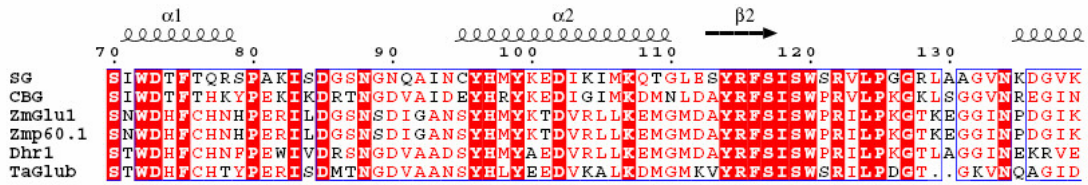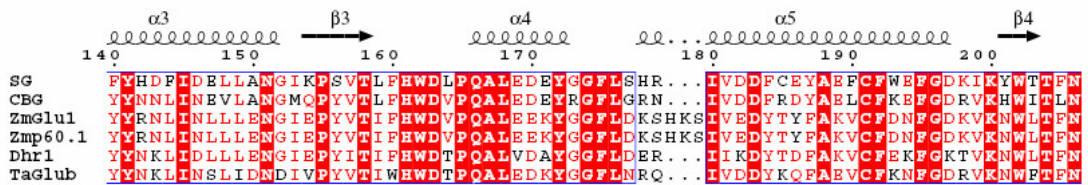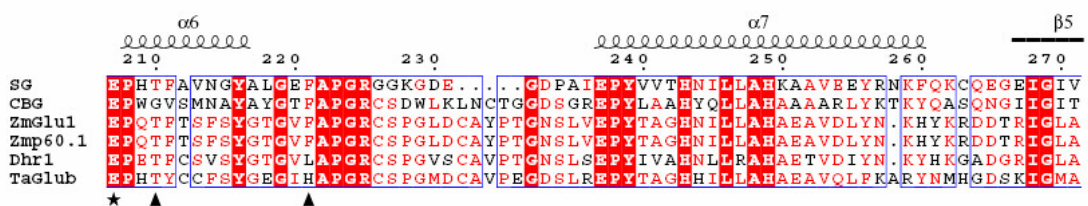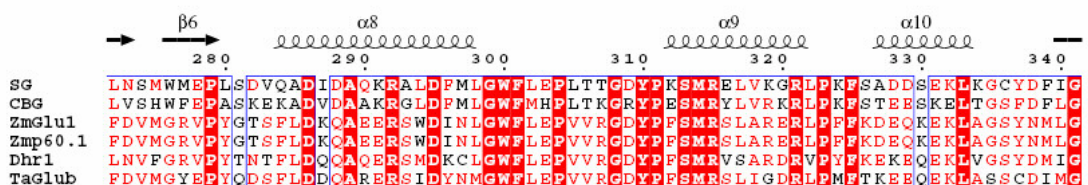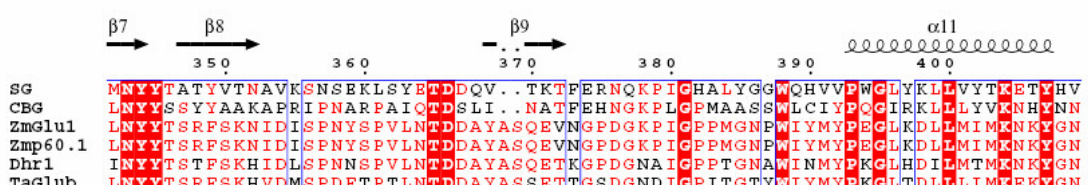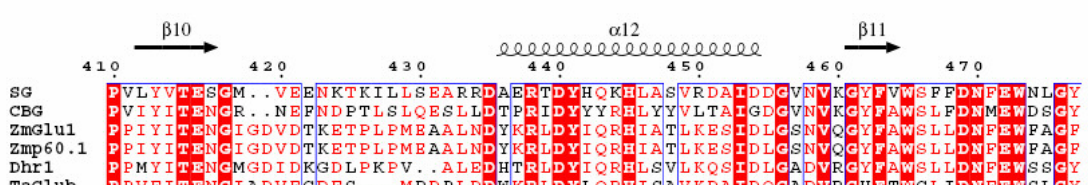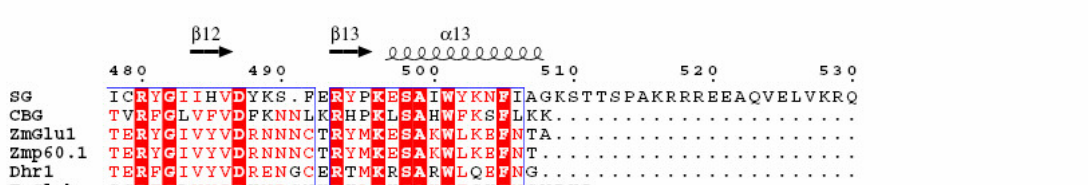

**Supplemental Figure 1.** Structure Based Alignment of  $\beta$ -Glucosidases of Family 1 from Higher Plants.

SG, strictosidine glucosidase from *Rauvolfia serpentina*; CBG, cyanogenic  $\beta$ -glucosidase from *Trifolium repens*; ZmGlu1, ZmGlu1 from *Zea maize*; Zmp60.1, Zmp60.1 from *Z. maize*; DHR1, Dhurrinase 1 from *Sorghum bicolor*; TaGlu1b, TaGlu1b from *Triticum aestivum*. The red asterisk indicates the conserved Trp388 and the two residues influencing its conformation are marked by red triangles. The two black asterisks show the conservation of the catalytic residues and eleven additional residues which are involved in binding strictosidine are marked by black triangles. Horizontal arrows above the sequences indicate  $\beta$ -strands (labeled  $\beta$ 1– $\beta$ 13); helical segments indicate  $\alpha$ -helices (labeled  $\alpha$ 1-  $\alpha$ 13). The sequence numbering is shown according to SG amino acid sequence.

**Table 1 supplementary**

Overall comparison of plant glucosidases to SG.

| PDB  | Identity (%) | Similarity (%) | r.m.s.d. (Å) | C $\alpha$ |
|------|--------------|----------------|--------------|------------|
| 1CBG | 54           | 68             | 0.79         | 448        |
| 1E1E | 45           | 67             | 0.87         | 437        |
| 1HXJ | 46           | 62             | 0.86         | 437        |
| 1V02 | 45           | 61             | 0.87         | 441        |
| 2DGA | 43           | 62             | 0.90         | 441        |

1CBG, cyanogenic  $\beta$ -glucosidase from *Trifolium repens*; 1E1E, ZmGlu1 from *Zea mays*; 1HXJ, Zmp60.1 from *Zea mays*; 1V02, Dhurrinase1 from *Sorghum bicolor*; 2DGA, TaGlu1b from *Triticum aestivum*.
